# Supplementary material for: The contribution of vitamin D insufficiency to the onset of steatotic liver disease among individuals with metabolic dysfunction
Source: Springer Nature journal article supplement (doi:10.1038/s41598-024-57380-9), 2024-03-20
Supplement: MOESM1 [file 41598_2024_57380_MOESM1_ESM.pdf]

Supplementary Table 1. Incidence of MAFLD according to vitamin D status when FLI  $\geq 30$  is defined as MAFLD

|               | aOR (95% CI)     | <i>P</i> -value |
|---------------|------------------|-----------------|
| <b>Men</b>    |                  |                 |
| Sufficiency   | Reference        |                 |
| Insufficiency | 1.25 (1.17-1.34) | <0.001          |
| <b>Women</b>  |                  |                 |
| Sufficiency   | Reference        |                 |
| Insufficiency | 1.39 (1.18-1.64) | <0.001          |

Adjusted odds ratios and *P*-values were calculated using binary logistic regression. The model was adjusted for age, year and quarter of health checkup, alcohol consumption, physical activity, and smoking status. Abbreviation: aOR, adjusted odds ratio; FLI, fatty liver index; MAFLD, metabolic associated fatty liver disease
